# Supplementary material for: SERS characterization of dopamine and in situ dopamine polymerization on silver nanoparticles
Source: Royal Society of Chemistry journal article supplement (doi:10.1039/d1cp00966d), 2021-01-01
Supplement: d1cp00966d1.pdf [file d1cp00966d1.pdf]

## Supplementary Information

### SERS characterization of dopamine and *in situ* dopamine polymerization on silver nanoparticles

*Isidro Badillo-Ramírez<sup>a\*</sup>, José M. Saniger<sup>a</sup>, Jürgen Popp<sup>b,c</sup> and Dana Cialla-May<sup>b,c</sup>*

a- Instituto de Ciencias Aplicadas y Tecnología, Universidad Nacional Autónoma de México, Circuito exterior S/N, Cd. Universitaria, 04510, Ciudad de México.

b-Friedrich Schiller University Jena, Institute of Physical Chemistry and Abbe Center of Photonics, Helmholtzweg 4, 07745, Jena, Germany.

c-Leibniz Institute of Photonic Technology Jena, Member of the Leibniz Research Alliance – Leibniz Health Technologies, Albert-Einstein-Str. 9, 07745, Jena, Germany.

\*corresponding author: [ibadillo@ciencias.unam.mx](mailto:ibadillo@ciencias.unam.mx)

#### Table of Content

Figure S1. Raman spectrum of DA in saturated solution

Figure S2. Comparative SERS profiles of DA in c-AgNPs and h-AgNPs

Figure S3. SERS spectra of DA h-Ag after 225 min with *in situ* mixture.

Figure S4. Raman spectrum of dried PDA.

Figure S5. Peak fitted SERS spectrum of DA in pH 12.

Figure S6. SEM image of the AgNP-PDA complex structures.

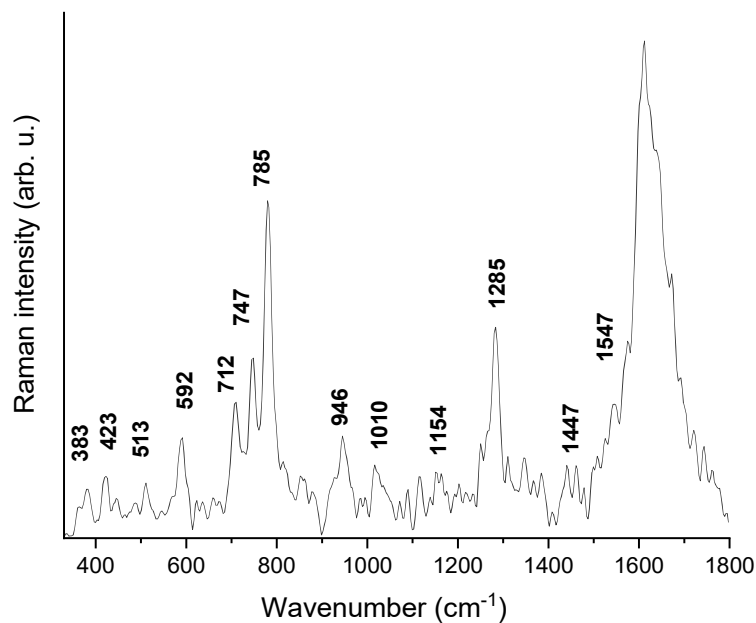

**Figure S1.** Raman spectrum, collected with a 488 nm laser excitation, of a saturated DA solution (> 5mM) in ultra pure water.

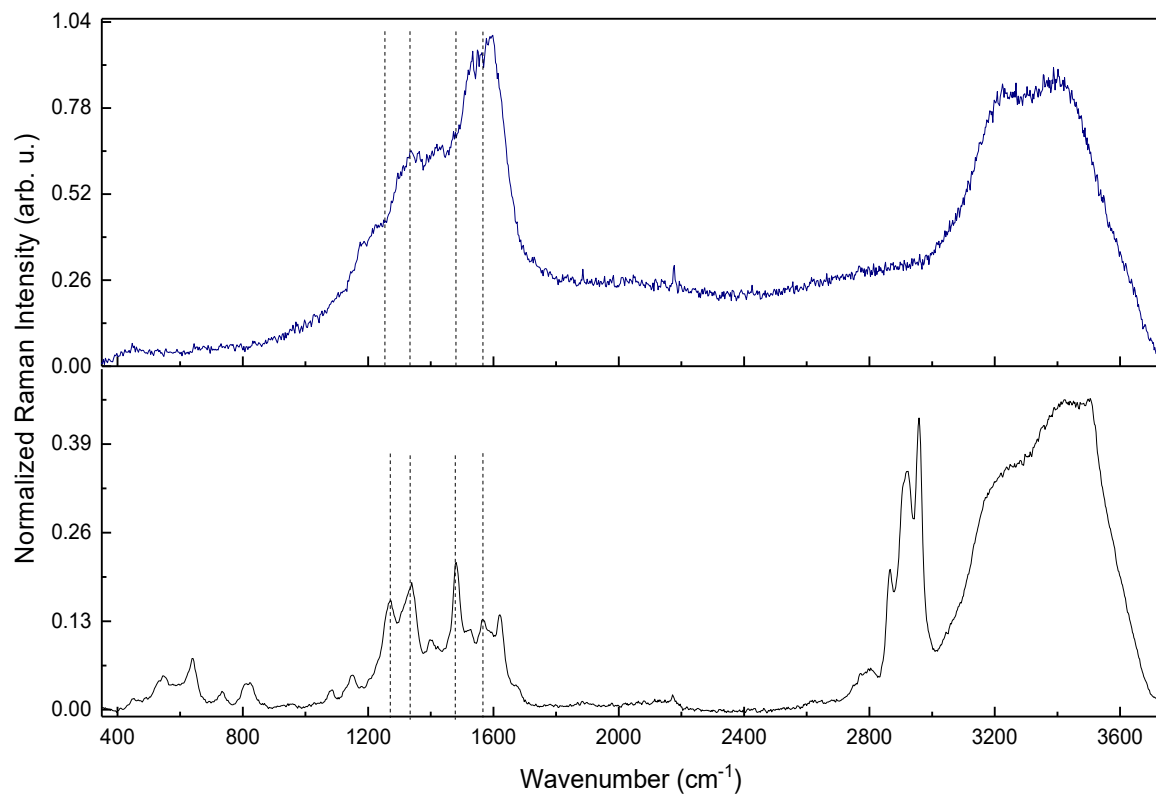

**Figure S2.** Comparative SERS profile of DA collected in c-AgNPs (black line) and in h-AgNPs at 5 min of mixture (blue line). Dotted lines indicate the similar wavenumber band positions found in each spectrum.

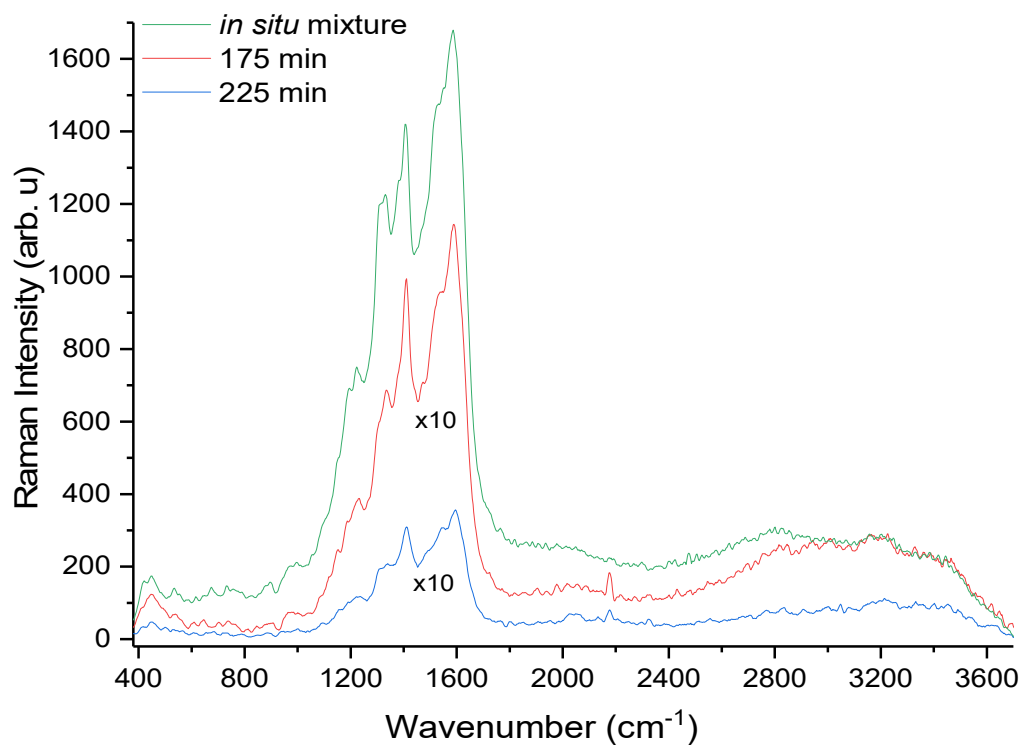

**Figure S3.** SERS spectra of DA collected in h-Ag NPs after 175 and 225 min with further in situ mixture of colloidal solution.

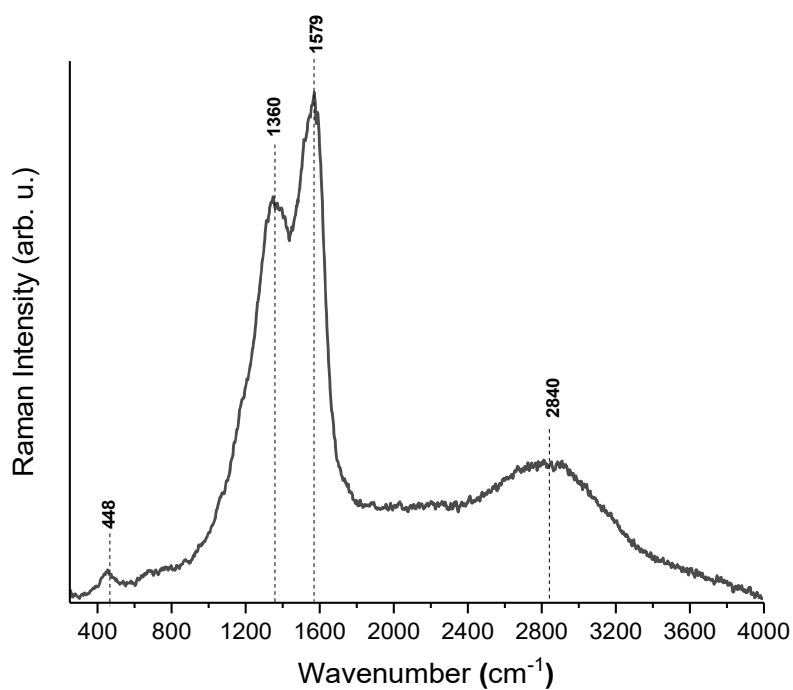

**Figure S4.** Full Raman spectrum of PDA film, obtained from the oxidation of DA in h-AgNPs at pH 9, incubated for 24 h and dried at room temperature.

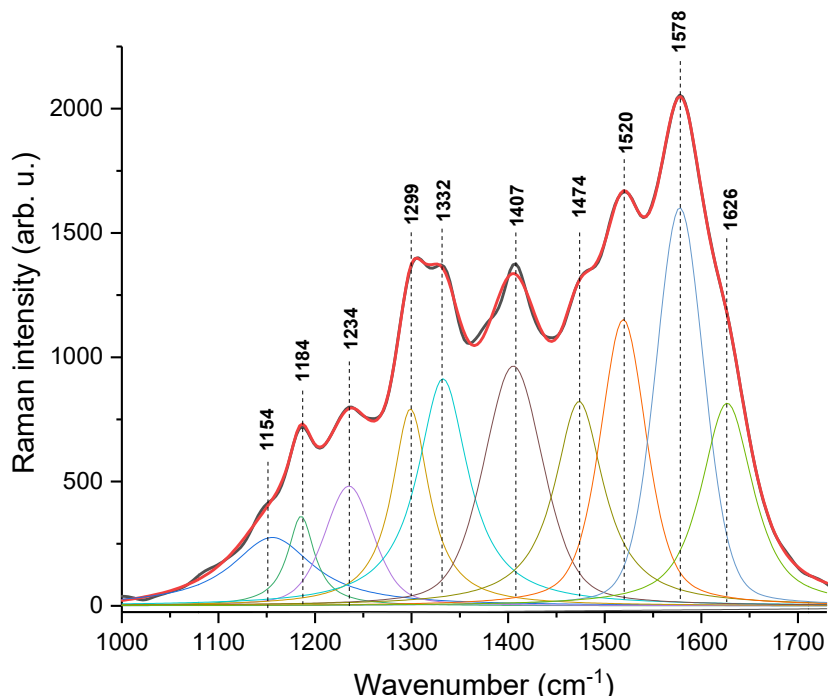

**Figure S5.** Peak fitted of the SERS spectrum of DA in h-AgNPs in pH 12, collected after 15 min of consecutive laser radiation at 488 nm. Wavenumber positions in each band were assigned in Table 1, main text.

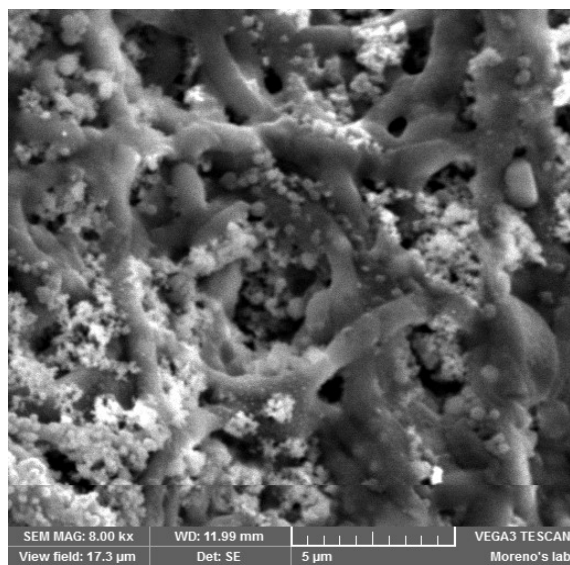

**Figure S6.** SEM image of the AgNP-PDA complex structures, obtained after the 24 h incubation of DA at pH 9 with h-AgNPs and the laser radiation at 488 nm.
